# Supplementary material
Source: PubMed Central journal article supplement (PMC1266115)
Supplement: pnas_0506580102v2_2.pdf [file pnas_0506580102v2_2.pdf]

**Table 3. Molecular Signature Database (MSigDB) collections**

| <b>Database</b> | <b>Total number of sets</b> | <b>Number of sets smaller than 15</b> | <b>Number of sets greater than 500</b> | <b>Number of sets used</b> | <b>Percent used</b> |
|-----------------|-----------------------------|---------------------------------------|----------------------------------------|----------------------------|---------------------|
| C1              | 319                         | 74                                    | 10                                     | 235                        | 74                  |
| C2              | 522                         | 194                                   | 0                                      | 328                        | 63                  |
| C3              | 57                          | 0                                     | 0                                      | 57                         | 100                 |
| C4              | 427                         | 0                                     | 0                                      | 427                        | 100                 |

Listed are the number of gene sets in each collection, the numbers of sets that pass the size thresholds (min = 15, max = 500), and the final number of sets used in the examples in the text.
