# Supplementary material
Source: PubMed Central journal article supplement (PMC1266115)
Supplement: pnas_0506580102v2_3.pdf [file pnas_0506580102v2_3.pdf]

**Table 5. Functional autosomal gene set enrichment with respect to gender**

| <b>Gene set</b>                                                | <b>Source</b>    | <b><i>ES</i></b> | <b><i>NES</i></b> | <b><i>Nominal p-value</i></b> | <b><i>FDR</i></b> |
|----------------------------------------------------------------|------------------|------------------|-------------------|-------------------------------|-------------------|
| <b>Data set: Lymphoblast cell lines</b>                        |                  |                  |                   |                               |                   |
| <b>Enriched in males</b>                                       |                  |                  |                   |                               |                   |
| <b>C2:Testis expressed autosomal genes</b>                     | Experimental GNF | 0.559            | 1.724             | 0.001                         | 0.181             |
| <b>Enriched in females</b>                                     |                  |                  |                   |                               |                   |
| <b>C2:Female reproductive tissue expressed autosomal genes</b> | Experimental GNF | -0.457           | -1.830            | 0.004                         | 0.163             |

This table shows the GSEA results for the gender data set by using the functional collection C2 after restricting the gene set membership to autosomal genes. *ES*, enrichment score; *NES*, normalized enrichment score.
