# Supplementary material
Source: PubMed Central journal article supplement (PMC1266115)
Supplement: pnas_0506580102v2_4.pdf [file pnas_0506580102v2_4.pdf]

**Table 6. Single gene overlaps in lung cancer studies**

**Michigan / Boston (12)**

**KRT7**  
BZW1  
CASP4  
CSNK1E  
ENO2  
FADD  
KRT18  
KRT19  
LAMB3  
P4HA1  
PFKP  
TUBA1

**Michigan / Stanford (8)**

**KRT7**  
CSNK1E  
GALNT3  
HIP2  
ITGA2  
NP  
NPAS2  
PAICS

**Stanford / Boston (4)**

**KRT7**  
CASP4  
GOSR1  
PAICS

Pairwise overlaps are shown between the top 100 genes correlated with poor outcome in the Michigan, Boston, and Stanford data sets as depicted in Fig. 5. Pairwise overlap is determined by using genes that appear on the technology platforms of both studies. Restricting to genes on all 3 platforms would reduce the gene space by 50% in the Michigan study and by 70% in the Boston and Stanford studies.
