# Supplementary material
Source: PubMed Central journal article supplement (PMC1266115)
Supplement: pnas_0506580102v2_5.pdf [file pnas_0506580102v2_5.pdf]

**Table 8. Probe set to gene ID reduction**

| Number of probe set ids per gene | Number of genes | Percent of genes |
|----------------------------------|-----------------|------------------|
| 1                                | 10,553          | 70.07            |
| 2                                | 2,758           | 18.31            |
| 3                                | 1,136           | 7.54             |
| 4                                | 407             | 2.70             |
| 5                                | 128             | 0.85             |
| 6                                | 46              | 0.31             |
| 7                                | 13              | 0.09             |
| 8                                | 9               | 0.06             |
| 9                                | 5               | 0.03             |
| 10                               | 3               | 0.02             |
| 11                               | 1               | 0.01             |
| 12                               | 0               | 0.00             |
| 13                               | 1               | 0.01             |
| Total                            | 15,060          |                  |

**HGU133A**

| Number of probe set ids per gene | Number of genes | Percent of genes |
|----------------------------------|-----------------|------------------|
| 1                                | 8,276           | 81.91            |
| 2                                | 1,326           | 13.12            |
| 3                                | 381             | 3.77             |
| 4                                | 83              | 0.82             |
| 5                                | 18              | 0.18             |
| 6                                | 11              | 0.11             |
| 7                                | 6               | 0.06             |
| 8                                | 3               | 0.03             |
| 9                                | 0               | 0                |
| 10                               | 0               | 0                |
| 11                               | 0               | 0                |
| 12                               | 0               | 0                |
| 13                               | 0               | 0                |
| Total                            | 10,104          |                  |

**HGU95AV2**

| Number of probe set ids per gene | Number of genes | Percent of genes |
|----------------------------------|-----------------|------------------|
| 1                                | 5,670           | 89.8             |
| 2                                | 516             | 8.17             |
| 3                                | 102             | 1.62             |
| 4                                | 18              | 0.29             |
| 5                                | 2               | 0.03             |
| 6                                | 4               | 0.06             |
| 7                                | 1               | 0.02             |
| 8                                | 1               | 0.02             |
| 9                                | 0               | 0                |
| 10                               | 0               | 0                |
| 11                               | 0               | 0                |
| 12                               | 0               | 0                |
| 13                               | 0               | 0                |
| Total                            | 6,314           |                  |

**HU6800**

The distribution of probe sets per gene in the three Affymetrix chip types used on the data sets in the paper are shown. The data displayed is binned by the number of probes per gene. The majority of the overrepresentation arises from two or three probes per gene. In our analyses, we chose the maximally expressed probe as the single representative of the corresponding gene.
